# Supplementary material for: Assessment of learning curves in complex surgical interventions: a consecutive case-series study
Source: PubMed Central journal article supplement (PMC4888720; doi:10.1186/s13063-016-1383-4), 2016-06-01

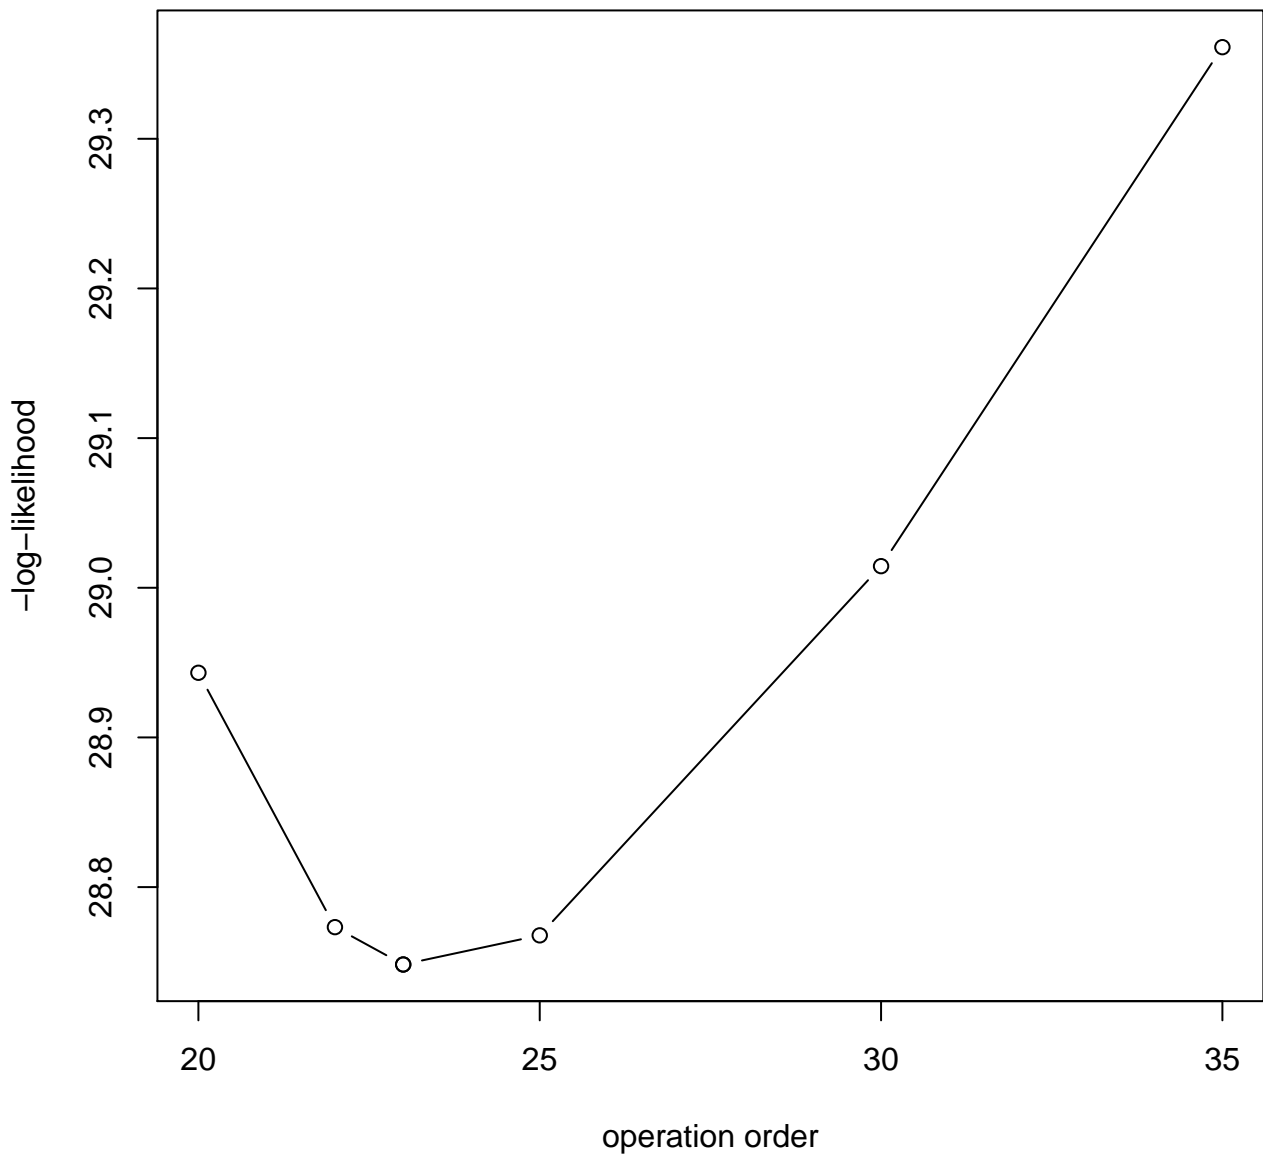

Supplement: 13063_2016_1383_MOESM2_ESM.pdf [file 13063_2016_1383_MOESM2_ESM.pdf]
